# Supplementary material
Source: publisher site journal article supplement (https://www.dovepress.com/article/215373)
Supplement: Supplementary file 1 [file get_supplementary_file.php]

# Appendices

A Pathway distal pancreatectomy

B Pathway pancreatectomy

| NAME:                          |                                                                                                                                                                                                                                                                                                                                                                                                                                                                                                                                                                                                                                                                                                                                                                                                                                 | SURNAME:                                                                                                                                                                                                                                                             |                                                                                                                                                                                                                                                                                                                                                                                                                                                                                                                                                                                                                                                                                                                                                                                                                                                                                                                    |                                                                                                                                                                                                                                                                                                       | DATE OF BIRTH:                                                                                                                                                                                                          |                                                                                                                                                                                                                                                                                                                                                                                                                                 |                                                                     | DATE OF SURGERY:                                                                                                                                                                                                                                                                                               | DATE OF DISCHARGE: |
|--------------------------------|---------------------------------------------------------------------------------------------------------------------------------------------------------------------------------------------------------------------------------------------------------------------------------------------------------------------------------------------------------------------------------------------------------------------------------------------------------------------------------------------------------------------------------------------------------------------------------------------------------------------------------------------------------------------------------------------------------------------------------------------------------------------------------------------------------------------------------|----------------------------------------------------------------------------------------------------------------------------------------------------------------------------------------------------------------------------------------------------------------------|--------------------------------------------------------------------------------------------------------------------------------------------------------------------------------------------------------------------------------------------------------------------------------------------------------------------------------------------------------------------------------------------------------------------------------------------------------------------------------------------------------------------------------------------------------------------------------------------------------------------------------------------------------------------------------------------------------------------------------------------------------------------------------------------------------------------------------------------------------------------------------------------------------------------|-------------------------------------------------------------------------------------------------------------------------------------------------------------------------------------------------------------------------------------------------------------------------------------------------------|-------------------------------------------------------------------------------------------------------------------------------------------------------------------------------------------------------------------------|---------------------------------------------------------------------------------------------------------------------------------------------------------------------------------------------------------------------------------------------------------------------------------------------------------------------------------------------------------------------------------------------------------------------------------|---------------------------------------------------------------------|----------------------------------------------------------------------------------------------------------------------------------------------------------------------------------------------------------------------------------------------------------------------------------------------------------------|--------------------|
| A Distal pancreatectomy        | PRE-ADMISSION                                                                                                                                                                                                                                                                                                                                                                                                                                                                                                                                                                                                                                                                                                                                                                                                                   | INPATIENT TREATMENT Admission                                                                                                                                                                                                                                        | Day of surgery                                                                                                                                                                                                                                                                                                                                                                                                                                                                                                                                                                                                                                                                                                                                                                                                                                                                                                     | 1st postoperative day                                                                                                                                                                                                                                                                                 | 2nd postoperative day                                                                                                                                                                                                   | 3rd-12th. postoperative day                                                                                                                                                                                                                                                                                                                                                                                                     | DAY OF DISCHARGE 12th postoperative day                             | POST-DISCHARGE                                                                                                                                                                                                                                                                                                 |                    |
| <b>DIAGNOSTICS/MONITORING/</b> | <input type="checkbox"/> medical history<br><input type="checkbox"/> clinical examination<br><input type="checkbox"/> laboratory (blood count, electrolytes, liver- and kidney-specific values, coagulation, HbA1c for all patients, CEA, CA 19-9)<br><input type="checkbox"/> CT or MRI upper abdomen, chest X-ray, if suspicious-> chest CT<br><input type="checkbox"/> after staging: case review at multidisciplinary tumor conference<br><input type="checkbox"/> if albumin <30 g/l: presentation at nutrition clinic<br><input type="checkbox"/> in case of AP-elevation or clinical sings of cholestasis: ERCP + EPT<br><br><input type="checkbox"/> consent for anesthesia (including epidural catheter), additional exams on demand<br><input type="checkbox"/> define date of admission/surgery (patient management) | <input type="checkbox"/> laboratory (blood count, electrolytes, liver- and kidney-specific values, coagulation; CEA, CA 19-9 if not done pre-admission)<br><input type="checkbox"/> crossmatch blood and prepare 2 RCC ECG if not already performed at pre-admission | <u>Intraoperative monitoring:</u><br><input type="checkbox"/> BP/HR<br><input type="checkbox"/> Relaxation<br><input type="checkbox"/> body temperature (aim >36°C)<br><input type="checkbox"/> BS (target 120-200 mg/dl) every hour, correct with infusion of 5%-glucose or insulin bolus<br><input type="checkbox"/> FiO <sub>2</sub> (desired value 0,7)<br><input type="checkbox"/> CVP<br><br><u>Postoperative</u><br><input type="checkbox"/> intermediate care unit<br><input type="checkbox"/> monitor BP/HR<br><input type="checkbox"/> monitor urinary excretion<br><input type="checkbox"/> monitor surgical drains/ epidural anesthesia<br><input type="checkbox"/> blood sugar measurements every hour (target 150 mg/dl)<br><input type="checkbox"/> at night: small laboratory routine, blood count and coagulation<br><input type="checkbox"/> chest X-ray after central venous catheter insertion | <input type="checkbox"/> monitor BP/HR/ temperature twice a day.<br><input type="checkbox"/> blood count, electrolytes, liver- and kidney-specific values, coagulation, amylase/ lipase, CRP<br><input type="checkbox"/> blood sugar day profile<br><input type="checkbox"/> transfer to general ward | <input type="checkbox"/> monitor BP/HR/ temperature twice a day.<br><input type="checkbox"/> blood sugar day profile<br><input type="checkbox"/> endocrinological consultation in case of necessary insulin application | <input type="checkbox"/> monitor BP/HR/ temperature twice a day.<br><input type="checkbox"/> blood count, electrolytes, liver- and kidney-specific values, coagulation, amylase/ lipase (3 <sup>rd</sup> and 5 <sup>th</sup> POD), CRP<br><input type="checkbox"/> blood sugar day profile<br><input type="checkbox"/> endocrinological consultation in case of necessary insulin application after discontinuity of Octreotide | <input type="checkbox"/> monitor BP/HR/ temperature in the morning. | <input type="checkbox"/> medical history<br><input type="checkbox"/> clinical examination<br><input type="checkbox"/> temperature<br><input type="checkbox"/> blood count, electrolytes, liver- and kidney-specific values, coagulation, amylase/ lipase, CRP<br><input type="checkbox"/> abdominal sonography |                    |
| <b>ANAESTHESIA</b>             |                                                                                                                                                                                                                                                                                                                                                                                                                                                                                                                                                                                                                                                                                                                                                                                                                                 |                                                                                                                                                                                                                                                                      | <input type="checkbox"/> cefazolin 2g IV (in case of allergy ciprofloxacin 400 mg IV) / metronidazole 500 mg IV <u>30-60 minutes before surgery</u><br><input type="checkbox"/> prewarming<br><input type="checkbox"/> general anesthesia                                                                                                                                                                                                                                                                                                                                                                                                                                                                                                                                                                                                                                                                          |                                                                                                                                                                                                                                                                                                       |                                                                                                                                                                                                                         |                                                                                                                                                                                                                                                                                                                                                                                                                                 |                                                                     |                                                                                                                                                                                                                                                                                                                |                    |
| <b>LINES</b>                   |                                                                                                                                                                                                                                                                                                                                                                                                                                                                                                                                                                                                                                                                                                                                                                                                                                 |                                                                                                                                                                                                                                                                      | <input type="checkbox"/> G16 venous cannula<br><input type="checkbox"/> central venous catheter<br><input type="checkbox"/> arterial cannulation (only in case of high-risk patient)<br><input type="checkbox"/> removal of nasogastric tube soon after extubation<br><input type="checkbox"/> epidural anesthesia (Th 8-10)                                                                                                                                                                                                                                                                                                                                                                                                                                                                                                                                                                                       | <input type="checkbox"/> if applicable remove arterial cannula before transfer to general ward                                                                                                                                                                                                        | <input type="checkbox"/> remove venous cannula<br><input type="checkbox"/> remove central venous catheter                                                                                                               | <input type="checkbox"/> remove thoracic epidural catheter (in the morning of day 3 after surgery)                                                                                                                                                                                                                                                                                                                              |                                                                     |                                                                                                                                                                                                                                                                                                                |                    |
| <b>FOLEY CATHETER</b>          |                                                                                                                                                                                                                                                                                                                                                                                                                                                                                                                                                                                                                                                                                                                                                                                                                                 |                                                                                                                                                                                                                                                                      | <input type="checkbox"/> insertion of transurethral foley catheter before surgery                                                                                                                                                                                                                                                                                                                                                                                                                                                                                                                                                                                                                                                                                                                                                                                                                                  |                                                                                                                                                                                                                                                                                                       | <input type="checkbox"/> remove transurethral foley catheter                                                                                                                                                            |                                                                                                                                                                                                                                                                                                                                                                                                                                 |                                                                     |                                                                                                                                                                                                                                                                                                                |                    |

AC= anticoagulation, AP= alkaline phosphatase, BP= blood pressure, BS= blood sugar, ca.= circa, CRP= C-reactive protein, CVP= central venous pressure, DRG= diagnosis related groups, ECG= electrocardiogram, EDC= epidural catheter, EF= Easyflow-Drain, ERCP= endoscopic retrograde cholangiopancreatography, EPT= endoscopic papillotomy, G= Gauge, GH= general health, HPB= hepato-pancreatico-biliary, HR= heart rate, I.V. = intravenous, PAT= patient, POD= postoperative day, PT= physiotherapy, RCC= red cell concentrate, RT= respiratory therapy, sc= subcutaneous. This clinical pathway does not absolve therapists from their responsibility of impact, adverse effect, dosage, contraindications of substances for patients. Recommended dosage is for normal weight adults without contraindications.

|                           |                                                                                                                                                                                                                                                                                                                                                                                                                                                        |                                                                                                                                                                                                                                                                                                                                                                                                                                        |                                                                                                                                                                                                                                                                                                                                                                                                         |                                                                                                                                                                                                                                                                                                                                                                                                                                                              |                                                                                                                                                                                                                                                                                                                                                                                                                   |                                                                                                                                                                                                                                                                                                                                                                                                                                                              |                                                                                                                                                                                                                                                                                                                                                                                                        |                                                                                                                                                                                                                                                                                                                                                              |
|---------------------------|--------------------------------------------------------------------------------------------------------------------------------------------------------------------------------------------------------------------------------------------------------------------------------------------------------------------------------------------------------------------------------------------------------------------------------------------------------|----------------------------------------------------------------------------------------------------------------------------------------------------------------------------------------------------------------------------------------------------------------------------------------------------------------------------------------------------------------------------------------------------------------------------------------|---------------------------------------------------------------------------------------------------------------------------------------------------------------------------------------------------------------------------------------------------------------------------------------------------------------------------------------------------------------------------------------------------------|--------------------------------------------------------------------------------------------------------------------------------------------------------------------------------------------------------------------------------------------------------------------------------------------------------------------------------------------------------------------------------------------------------------------------------------------------------------|-------------------------------------------------------------------------------------------------------------------------------------------------------------------------------------------------------------------------------------------------------------------------------------------------------------------------------------------------------------------------------------------------------------------|--------------------------------------------------------------------------------------------------------------------------------------------------------------------------------------------------------------------------------------------------------------------------------------------------------------------------------------------------------------------------------------------------------------------------------------------------------------|--------------------------------------------------------------------------------------------------------------------------------------------------------------------------------------------------------------------------------------------------------------------------------------------------------------------------------------------------------------------------------------------------------|--------------------------------------------------------------------------------------------------------------------------------------------------------------------------------------------------------------------------------------------------------------------------------------------------------------------------------------------------------------|
| <b>SURGICAL TECHNIQUE</b> |                                                                                                                                                                                                                                                                                                                                                                                                                                                        |                                                                                                                                                                                                                                                                                                                                                                                                                                        | <input type="checkbox"/> Treatment of pancreas stump: fish-mouth closure in back-and-forth sutured (4-0)<br><input type="checkbox"/> Treatment of pancreas duct: cross stitch (5-0)                                                                                                                                                                                                                     |                                                                                                                                                                                                                                                                                                                                                                                                                                                              |                                                                                                                                                                                                                                                                                                                                                                                                                   |                                                                                                                                                                                                                                                                                                                                                                                                                                                              |                                                                                                                                                                                                                                                                                                                                                                                                        |                                                                                                                                                                                                                                                                                                                                                              |
|                           | <b>DRAINS</b>                                                                                                                                                                                                                                                                                                                                                                                                                                          |                                                                                                                                                                                                                                                                                                                                                                                                                                        | <input type="checkbox"/> 1 EF on pancreas stump, 1 EF subphrenic (left-sided)                                                                                                                                                                                                                                                                                                                           |                                                                                                                                                                                                                                                                                                                                                                                                                                                              |                                                                                                                                                                                                                                                                                                                                                                                                                   | <input type="checkbox"/> On 3. + 5. POD Amylase in target drains, remove target drains on day 5 after surgery if Amylase <250 U/l in drain fluid                                                                                                                                                                                                                                                                                                             | <input type="checkbox"/> Double sewing of target drains                                                                                                                                                                                                                                                                                                                                                | <input type="checkbox"/> Check target drain sewing; if necessary renew                                                                                                                                                                                                                                                                                       |
| <b>NUTRITION</b>          | <input type="checkbox"/> balanced diet, supplementary nutrition as required (nutrition clinic)                                                                                                                                                                                                                                                                                                                                                         | <input type="checkbox"/> balanced diet, supplementary nutrition as required (nutrition clinic)                                                                                                                                                                                                                                                                                                                                         | <input type="checkbox"/> sweetened tea up to two hours prior to surgery<br><input type="checkbox"/> two hours after surgery tea (max. 1500 ml); 2 portions of yoghurt                                                                                                                                                                                                                                   | <input type="checkbox"/> soft diet / diabetes diet<br><input type="checkbox"/> drink >1500 ml                                                                                                                                                                                                                                                                                                                                                                | <input type="checkbox"/> soft diet / diabetes diet<br><input type="checkbox"/> drink >1500 ml                                                                                                                                                                                                                                                                                                                     | <input type="checkbox"/> soft diet / diabetes diet<br><input type="checkbox"/> drink >1500 ml                                                                                                                                                                                                                                                                                                                                                                | <input type="checkbox"/> soft diet / diabetes diet<br><input type="checkbox"/> drink >1500 ml                                                                                                                                                                                                                                                                                                          | <input type="checkbox"/> balanced diet / diabetes diet                                                                                                                                                                                                                                                                                                       |
| <b>IV MANAGEMENT</b>      |                                                                                                                                                                                                                                                                                                                                                                                                                                                        |                                                                                                                                                                                                                                                                                                                                                                                                                                        | <input type="checkbox"/> maintain normovolaemia during surgery<br><input type="checkbox"/> Intraoperative/ postanaesthesia care unit /IMC: glucose G5% IV if blood sugar <120 mg/dl, insulin perfusor, glucose G5% IV if blood sugar >160 mg/dl (according to endocrinological consultation)<br><input type="checkbox"/> Postoperative fluid management according to CVP (target <5 cmH <sub>2</sub> O) | <input type="checkbox"/> none                                                                                                                                                                                                                                                                                                                                                                                                                                | <input type="checkbox"/> none                                                                                                                                                                                                                                                                                                                                                                                     | <input type="checkbox"/> none                                                                                                                                                                                                                                                                                                                                                                                                                                | <input type="checkbox"/> none                                                                                                                                                                                                                                                                                                                                                                          |                                                                                                                                                                                                                                                                                                                                                              |
| <b>DEFECATION</b>         |                                                                                                                                                                                                                                                                                                                                                                                                                                                        |                                                                                                                                                                                                                                                                                                                                                                                                                                        |                                                                                                                                                                                                                                                                                                                                                                                                         | <input type="checkbox"/> magnesium 5 mmol/l as solution po till until first defecation                                                                                                                                                                                                                                                                                                                                                                       | <input type="checkbox"/> magnesium 5 mmol/l as solution po till until first defecation                                                                                                                                                                                                                                                                                                                            | <input type="checkbox"/> magnesium 5 mmol/l as solution po till until first defecation                                                                                                                                                                                                                                                                                                                                                                       |                                                                                                                                                                                                                                                                                                                                                                                                        |                                                                                                                                                                                                                                                                                                                                                              |
| <b>MEDICATION</b>         | <input type="checkbox"/> continue medication<br><input type="checkbox"/> stop coagulation inhibitors, in case of warfarin or direct oral anticoagulants: Fraxiparine 0,1 / 10 kg body weight bid<br><input type="checkbox"/> Stop oral antidiabetic medication on admission day, (Metformin 48h prior to surgery)<br><input type="checkbox"/> If splenectomy is planned: vaccination with Pneumovax 23, Mencevax ACWY, Act-HiB >14 days before surgery | <input type="checkbox"/> home medication with stated restrictions<br><input type="checkbox"/> blood sugar measurements every 6 hours<br><input type="checkbox"/> BS (target 120-200 mg/dl) l<br><input type="checkbox"/> insulin scheme: BS 180-210: +2 iE; BS 210-240: +3 iE; BS 240-270: +4 iE BS 300-350: +6 iE BS 350-400: +8 iE basal insulin sc<br><input type="checkbox"/> in case of full anticoagulation and planned thoracic | <input type="checkbox"/> home medication up to two hours before surgery (consider above mentioned exceptions)<br><input type="checkbox"/> premedication as recommended by anesthesiologist<br><input type="checkbox"/> in the morning: no Fraxiparine<br><input type="checkbox"/> in case of soft pancreas tissue or small duct (< 3 mm): intraoperative Octreotide 1 x 100 µg sc                       | <input type="checkbox"/> home medication with stated restrictions<br><input type="checkbox"/> blood sugar measurements every 6 hours<br><input type="checkbox"/> BS (target 120-200 mg/dl)<br><input type="checkbox"/> insulin scheme: BS 180-210: +2 iE; BS 210-240: +3 iE; BS 240-270: +4 iE BS 300-350: +6 iE BS 350-400: +8 iE basal insulin sc<br><input type="checkbox"/> Pantoprazole 40 mg p.o. 1-0-0<br><input type="checkbox"/> Fraxiparine 0,3 ml | <input type="checkbox"/> home medication with stated restrictions, restart oral antidiabetic medication after 48h after surgery<br><input type="checkbox"/> blood sugar measurements every 6 hours<br><input type="checkbox"/> BS (target 120-200 mg/dl)<br><input type="checkbox"/> insulin scheme: BS 180-210: +2 iE; BS 210-240: +3 iE; BS 240-270: +4 iE BS 300-350: +6 iE BS 350-400: +8 iE basal insulin sc | <input type="checkbox"/> home medication with stated restrictions<br><input type="checkbox"/> blood sugar measurements every 6 hours<br><input type="checkbox"/> BS (target 120-200 mg/dl)<br><input type="checkbox"/> insulin scheme: BS 180-210: +2 iE; BS 210-240: +3 iE; BS 240-270: +4 iE BS 300-350: +6 iE BS 350-400: +8 iE basal insulin sc<br><input type="checkbox"/> Pantoprazole 40 mg p.o. 1-0-0<br><input type="checkbox"/> Fraxiparine 0,3 ml | <input type="checkbox"/> home medication with stated restrictions<br><input type="checkbox"/> Pantoprazole 40 mg p.o. 1-0-0<br><input type="checkbox"/> Fraxiparine 0,3 ml sc 0-0-1 (in case of full anticoagulation: Fraxiparine 0,1 / 10 kg body weight twice a day)<br><input type="checkbox"/> pancreatic enzymes 3 x 25000 iE in case of steatorrhea<br><input type="checkbox"/> after splenecto- | <input type="checkbox"/> home medication, restart anticoagulant medication 14 days after surgery<br><input type="checkbox"/> pancreatic enzymes 3 x 25000 iE in case of steatorrhea<br><input type="checkbox"/> if vaccination could not be realized on ward or by family physician after splenectomy: vaccination with Pneumovax 23, Mencevax ACWY, Act-HiB |

AC= anticoagulation, AP= alkaline phosphatase, BP= blood pressure, BS= blood sugar, ca.= circa, CRP= C-reactive protein, CVP= central venous pressure, DRG= diagnosis related groups, ECG= electrocardiogram, EDC= epidural catheter, EF= Easyflow-Drain, ERCP= endoscopic retrograde cholangiopancreatography, EPT= endoscopic papillotomy, G= Gauge, GH= general health, HPB= hepato-pancreatico-biliary, HR= heart rate, I.V. = intravenous, PAT= patient, POD= postoperative day, PT= physiotherapy, RCC= red cell concentrate, RT= respiratory therapy, sc= subcutaneous. This clinical pathway does not absolve therapists from their responsibility of impact, adverse effect, dosage, contraindications of substances for patients. Recommended dosage is for normal weight adults without contraindications.

|                          |  |                                                              |                                                                                                                                                                                                                                                |                                                                                                                                                                                                                                                                                            |                                                                                                                                                                                                                                                                                                                                                                                                                                                                    |                                                                                                                                                                                                                                                                                                                                                                             |                                                                                                                                                                                                                                                                                     |                                    |
|--------------------------|--|--------------------------------------------------------------|------------------------------------------------------------------------------------------------------------------------------------------------------------------------------------------------------------------------------------------------|--------------------------------------------------------------------------------------------------------------------------------------------------------------------------------------------------------------------------------------------------------------------------------------------|--------------------------------------------------------------------------------------------------------------------------------------------------------------------------------------------------------------------------------------------------------------------------------------------------------------------------------------------------------------------------------------------------------------------------------------------------------------------|-----------------------------------------------------------------------------------------------------------------------------------------------------------------------------------------------------------------------------------------------------------------------------------------------------------------------------------------------------------------------------|-------------------------------------------------------------------------------------------------------------------------------------------------------------------------------------------------------------------------------------------------------------------------------------|------------------------------------|
|                          |  | EDC: Fraxiparine 0,1 / 10 kg body weight only in the morning |                                                                                                                                                                                                                                                | sc 0-0-1 (in case of full anticoagulation: Fraxiparine 0,1 / 10 kg body weight twice a day<br><input type="checkbox"/> in case of soft pancreas tissue or small duct (< 3 mm): Octreotide 3 x 100 µg sc<br><input type="checkbox"/> pancreatic enzymes 3 x 25000 iE in case of steatorrhea | <input type="checkbox"/> Pantoprazole 40 mg p.o. 1-0-0<br><input type="checkbox"/> Fraxiparine 0,3 ml sc 0-0-1 (in case of full anticoagulation: Fraxiparine 0,1 / 10 kg body weight twice a day; in case planned removal the next day no Fraxiparine at nighttime<br><input type="checkbox"/> in case of soft pancreas tissue or small duct (< 3 mm): Octreotide 3 x 100 µg sc<br><input type="checkbox"/> pancreatic enzymes 3 x 25000 iE in case of steatorrhea | sc 0-0-1 (in case of full anticoagulation: Fraxiparine 0,1 / 10 kg body weight twice a day; in case planned removal the next day no Fraxiparine at nighttime<br><input type="checkbox"/> in case of soft pancreas tissue or small duct (< 3 mm): Octreotide 3 x 100 µg sc: (until POD 5)<br><input type="checkbox"/> pancreatic enzymes 3 x 25000 iE in case of steatorrhea | my: vaccination with Pneumovax 23, Mencevax ACWY, Act-HiB                                                                                                                                                                                                                           |                                    |
| <b>TRANSFUSION</b>       |  |                                                              | <input type="checkbox"/> if Hb <8 g/dl or cardiopulmonary disorders                                                                                                                                                                            | <input type="checkbox"/> if Hb <8 g/dl or cardiopulmonary disorders                                                                                                                                                                                                                        | <input type="checkbox"/> if Hb <8 g/dl or cardiopulmonary disorders                                                                                                                                                                                                                                                                                                                                                                                                | <input type="checkbox"/> if Hb < 8g/dl or cardiopulmonary disorders                                                                                                                                                                                                                                                                                                         |                                                                                                                                                                                                                                                                                     |                                    |
| <b>ANALGESIA</b>         |  |                                                              | <u>Intraoperative</u><br><input type="checkbox"/> metamizole 1 g I.V.<br><br><u>Postoperative</u><br><input type="checkbox"/> metamizole 1 g I.V.<br><input type="checkbox"/> piritramide 7,5 mg IV only in case of failed epidural anesthesia | <input type="checkbox"/> to avoid                                                                                                                                                                                                                                                          | <input type="checkbox"/> to avoid                                                                                                                                                                                                                                                                                                                                                                                                                                  | <input type="checkbox"/> to avoid                                                                                                                                                                                                                                                                                                                                           |                                                                                                                                                                                                                                                                                     |                                    |
| <b>oral</b>              |  |                                                              |                                                                                                                                                                                                                                                | <b>Pain ladder</b><br><br><i>Step 1:</i> metamizole 4x1 g p.o., on demand. paracetamol 4x1g p.o.<br><br><i>Step 2:</i> additional oxycodone/naloxone 10/5 mg p.o., oxycodone 5-10 mg on demand<br><br><i>Step 3:</i> pain consultation<br><br>oxycodone/naloxone 5/2,5 mg at age>75        | <b>Pain ladder</b><br><br><i>Step 1:</i> metamizole 4x1 g p.o., on demand. paracetamol 4x1g p.o.<br><br><i>Step 2:</i> additional oxycodone/naloxone 10/5 mg p.o., oxycodone 5-10 mg on demand<br><br><i>Step 3:</i> pain consultation<br><br>oxycodone/naloxone 5/2,5 mg at age>75                                                                                                                                                                                | <b>Pain ladder</b><br><br><i>Step 1:</i> metamizole 4x1 g p.o., on demand. paracetamol 4x1g p.o.<br><br><i>Step 2:</i> additional oxycodone/naloxone 10/5 mg p.o., oxycodone 5-10 mg on demand<br><br><i>Step 3:</i> pain consultation<br><br>oxycodone/naloxone 5/2,5 mg at age>75                                                                                         | <b>Pain ladder</b><br><br><i>Step 1:</i> metamizole 4x1 g p.o., on demand. paracetamol 4x1g p.o.<br><br><i>Step 2:</i> additional oxycodone/naloxone 10/5 mg p.o., oxycodone 5-10 mg on demand<br><br><i>Step 3:</i> pain consultation<br><br>oxycodone/naloxone 5/2,5 mg at age>75 | <input type="checkbox"/> on demand |
| <b>EPIDURAL CATHETER</b> |  |                                                              | <input type="checkbox"/> thoracic epidural delivery pump: ropivacaine 0,2% + 20 µg sufentanil epidural (46 ml ropivacaine 0,2% + 4 ml sufentanil epidural = 0,4 µg sufentanil/ml), 3-7 ml/h                                                    | <input type="checkbox"/> thoracic epidural catheter (T8-10) as stated before                                                                                                                                                                                                               | <input type="checkbox"/> thoracic epidural catheter (T8-10) as stated before                                                                                                                                                                                                                                                                                                                                                                                       | <input type="checkbox"/> remove thoracic epidural catheter in the morning of day 3 after surgery (in case of full anticoagulation pause Fraxiparine 24h before removal and 2-4h thereafter)                                                                                                                                                                                 |                                                                                                                                                                                                                                                                                     |                                    |

AC= anticoagulation, AP= alkaline phosphatase, BP= blood pressure, BS= blood sugar, ca.= circa, CRP= C-reactive protein, CVP= central venous pressure, DRG= diagnosis related groups, ECG= electrocardiogram, EDC= epidural catheter, EF= Easyflow-Drain, ERCP= endoscopic retrograde cholangiopancreatography, EPT= endoscopic papillotomy, G= Gauge, GH= general health, HPB= hepato-pancreatico-biliary, HR= heart rate, I.V. = intravenous, PAT= patient, POD= postoperative day, PT= physiotherapy, RCC= red cell concentrate, RT= respiratory therapy, sc= subcutaneous. This clinical pathway does not absolve therapists from their responsibility of impact, adverse effect, dosage, contraindications of substances for patients. Recommended dosage is for normal weight adults without contraindications.

|                                                                           |                                                                                                                                                                              |                                                                                                                                                                         |                                                                                                                                                                                                                                                                     |                                                                                                                                                                         |                                                                                                                          |                                                                                                                                                                                                                                                                                                                                                                               |                                                                                                                                                                                              |                                                                                                                                                          |
|---------------------------------------------------------------------------|------------------------------------------------------------------------------------------------------------------------------------------------------------------------------|-------------------------------------------------------------------------------------------------------------------------------------------------------------------------|---------------------------------------------------------------------------------------------------------------------------------------------------------------------------------------------------------------------------------------------------------------------|-------------------------------------------------------------------------------------------------------------------------------------------------------------------------|--------------------------------------------------------------------------------------------------------------------------|-------------------------------------------------------------------------------------------------------------------------------------------------------------------------------------------------------------------------------------------------------------------------------------------------------------------------------------------------------------------------------|----------------------------------------------------------------------------------------------------------------------------------------------------------------------------------------------|----------------------------------------------------------------------------------------------------------------------------------------------------------|
| <b>REHAB</b>                                                              |                                                                                                                                                                              |                                                                                                                                                                         |                                                                                                                                                                                                                                                                     |                                                                                                                                                                         |                                                                                                                          | <input type="checkbox"/> request rehabilitation treatment, when no adjuvant treatment is planned                                                                                                                                                                                                                                                                              |                                                                                                                                                                                              | <input type="checkbox"/> inquire about rehabilitation treatment                                                                                          |
| <b>QUALITY MANAGEMENT/ MEDICAL REPORT/ DRG (diagnosis related groups)</b> |                                                                                                                                                                              |                                                                                                                                                                         | <input type="checkbox"/> collect tissue samples for research<br><input type="checkbox"/> request pathology report (surgeon)<br><input type="checkbox"/> brief operation report (surgeon)<br><input type="checkbox"/> detailed operation report (written by surgeon) |                                                                                                                                                                         |                                                                                                                          | <input type="checkbox"/> check pathology report<br><input type="checkbox"/> case review at multidisciplinary tumor conference<br><input type="checkbox"/> plan outpatient follow up appointment on day 8 after surgery<br><input type="checkbox"/> prepare discharge letter for referring physicians (including postoperative recommendations and post discharge appointment) | <input type="checkbox"/> hand discharge letter to patient<br><input type="checkbox"/> hand chart to chief resident for DRG coding                                                            |                                                                                                                                                          |
| <b>INFORMATION AND CONSENT</b>                                            | <input type="checkbox"/> avoid alcohol and smoking 14 days before surgery<br><input type="checkbox"/> informed consent<br><input type="checkbox"/> hand out patient brochure | <input type="checkbox"/> pre-operation discussion                                                                                                                       | <input type="checkbox"/> information of next-of-kin by surgeon (red sheet)<br><input type="checkbox"/> inform patient postoperatively<br><input type="checkbox"/> inform referring physicians                                                                       |                                                                                                                                                                         |                                                                                                                          |                                                                                                                                                                                                                                                                                                                                                                               | <input type="checkbox"/> final discussion with patient and next-of-kin (histological result and postoperative recommendations)<br><input type="checkbox"/> phone call to referring physician | <input type="checkbox"/> discuss histological result and further recommendations with patient (if not happened before), communicate further appointments |
| <b>NURSING</b>                                                            |                                                                                                                                                                              | <input type="checkbox"/> PAT-admission + information<br><input type="checkbox"/> PAT-history<br><input type="checkbox"/> „red sheet “: next-of-kin phone number         | <u>Postoperative:</u><br><input type="checkbox"/> PAT-information<br><input type="checkbox"/> counseling/guidance<br><input type="checkbox"/> effectuation of orders from operative report                                                                          |                                                                                                                                                                         |                                                                                                                          | <input type="checkbox"/> prepare discharge documents<br><input type="checkbox"/> schedule outpatient follow-up appointment on day 8 after surgery<br><input type="checkbox"/> discharge talk                                                                                                                                                                                  | <input type="checkbox"/> PAT-discharge                                                                                                                                                       |                                                                                                                                                          |
| <b>patient admission/ discharge</b>                                       |                                                                                                                                                                              |                                                                                                                                                                         |                                                                                                                                                                                                                                                                     |                                                                                                                                                                         |                                                                                                                          |                                                                                                                                                                                                                                                                                                                                                                               |                                                                                                                                                                                              |                                                                                                                                                          |
| <b>medical round / elaboration</b>                                        |                                                                                                                                                                              | <input type="checkbox"/> participation in ward round<br><input type="checkbox"/> effectuation of ward round orders<br><input type="checkbox"/> print laboratory results | <input type="checkbox"/> participation in ward round<br><input type="checkbox"/> effectuation of ward round orders<br><input type="checkbox"/> print laboratory results                                                                                             | <input type="checkbox"/> participation in ward round<br><input type="checkbox"/> effectuation of ward round orders<br><input type="checkbox"/> print laboratory results | <input type="checkbox"/> participation in ward round<br><input type="checkbox"/> effectuation of ward round orders       | <input type="checkbox"/> participation in ward round<br><input type="checkbox"/> effectuation of ward round orders                                                                                                                                                                                                                                                            | <input type="checkbox"/> participation in ward round<br><input type="checkbox"/> effectuation of ward round orders<br><input type="checkbox"/> printout of laboratory results                |                                                                                                                                                          |
| <b>documentation</b>                                                      | <input type="checkbox"/> insert CP sheet into inpatient chart                                                                                                                | <input type="checkbox"/> insert CP sheet into inpatient chart                                                                                                           | <input type="checkbox"/> document secondary diagnosis (DRG form)<br><input type="checkbox"/> document nursing activities                                                                                                                                            | <input type="checkbox"/> document secondary diagnosis (DRG form)<br><input type="checkbox"/> document nursing activities                                                | <input type="checkbox"/> document secondary diagnosis (DRG form)<br><input type="checkbox"/> document nursing activities | <input type="checkbox"/> document secondary diagnosis (DRG form)<br><input type="checkbox"/> document nursing activities                                                                                                                                                                                                                                                      | <input type="checkbox"/> document secondary diagnosis (DRG form)<br><input type="checkbox"/> document nursing activities                                                                     | <input type="checkbox"/> document secondary diagnosis (DRG form)<br><input type="checkbox"/> document nursing activities                                 |

AC= anticoagulation, AP= alkaline phosphatase, BP= blood pressure, BS= blood sugar, ca.= circa, CRP= C-reactive protein, CVP= central venous pressure, DRG= diagnosis related groups, ECG= electrocardiogram, EDC= epidural catheter, EF= Easyflow-Drain, ERCP= endoscopic retrograde cholangiopancreatography, EPT= endoscopic papillotomy, G= Gauge, GH= general health, HPB= hepato-pancreatico-biliary, HR= heart rate, I.V. = intravenous, PAT= patient, POD= postoperative day, PT= physiotherapy, RCC= red cell concentrate, RT= respiratory therapy, sc= subcutaneous. This clinical pathway does not absolve therapists from their responsibility of impact, adverse effect, dosage, contraindications of substances for patients. Recommended dosage is for normal weight adults without contraindications.

|                                   |  |                                                                                                              |                                                                                                              |                                                                                                                                                                                                                                               |                                                                                                                                                                                                                                               |                                                                                                                                                                                                                                                                                                                                        |                                                                                                                                                                                                                                               |                                                                                                              |
|-----------------------------------|--|--------------------------------------------------------------------------------------------------------------|--------------------------------------------------------------------------------------------------------------|-----------------------------------------------------------------------------------------------------------------------------------------------------------------------------------------------------------------------------------------------|-----------------------------------------------------------------------------------------------------------------------------------------------------------------------------------------------------------------------------------------------|----------------------------------------------------------------------------------------------------------------------------------------------------------------------------------------------------------------------------------------------------------------------------------------------------------------------------------------|-----------------------------------------------------------------------------------------------------------------------------------------------------------------------------------------------------------------------------------------------|--------------------------------------------------------------------------------------------------------------|
| <b>patient care</b>               |  | <input type="checkbox"/> care according to nursing standard<br><input type="checkbox"/> drug administration  | <input type="checkbox"/> care according to nursing standard<br><input type="checkbox"/> drug administration  | <input type="checkbox"/> care according to nursing standard<br><input type="checkbox"/> drug administration<br><input type="checkbox"/> BT (spirometer prophylaxis, expectorant, Pine menthol)<br><input type="checkbox"/> thromboprophylaxis | <input type="checkbox"/> care according to nursing standard<br><input type="checkbox"/> drug administration<br><input type="checkbox"/> BT (spirometer prophylaxis, expectorant, Pine menthol)<br><input type="checkbox"/> thromboprophylaxis | <input type="checkbox"/> care according to nursing standard<br><input type="checkbox"/> drug administration<br><input type="checkbox"/> BT (spirometer prophylaxis, expectorant, Pine menthol)<br><input type="checkbox"/> thromboprophylaxis<br><input type="checkbox"/> schedule discharge appointment at outpatient diabetes clinic | <input type="checkbox"/> care according to nursing standard<br><input type="checkbox"/> drug administration<br><input type="checkbox"/> BT (spirometer prophylaxis, expectorant, Pine menthol)<br><input type="checkbox"/> thromboprophylaxis |                                                                                                              |
| <b>mobilization/physiotherapy</b> |  |                                                                                                              | <input type="checkbox"/> mobilization: 5 h after surgery to edge of bed depending on age/GH/time             | <input type="checkbox"/> mobilization: >4h out of bed; walk on aisle twice, depending on age/GH<br><input type="checkbox"/> PT in case of COPD, impaired mobility, prolonged bedriddenness                                                    | <input type="checkbox"/> mobilization: >4h out of bed; walk on aisle twice, depending on age/GH<br><input type="checkbox"/> PT in case of COPD, impaired mobility, prolonged bedriddenness                                                    | <input type="checkbox"/> complete mobilization (in bed only during nap and at night)<br><input type="checkbox"/> PT in case of COPD, impaired mobility, prolonged bedriddenness                                                                                                                                                        | <input type="checkbox"/> complete mobilization (in bed only during nap and at night)                                                                                                                                                          |                                                                                                              |
| <b>patient control</b>            |  | <input type="checkbox"/> vital signs (HR, BP, temperature)<br><input type="checkbox"/> pain intensity (1-10) | <input type="checkbox"/> vital signs (HR, BP, temperature)<br><input type="checkbox"/> pain intensity (1-10) | <input type="checkbox"/> vital signs (HR, BP, temperature, breathing)<br><input type="checkbox"/> pain intensity (1-10)                                                                                                                       | <input type="checkbox"/> vital signs (HR, BP, temperature)<br><input type="checkbox"/> pain intensity (1-10)                                                                                                                                  | <input type="checkbox"/> vital signs (HR, BP, temperature)<br><input type="checkbox"/> pain intensity (1-10)                                                                                                                                                                                                                           | <input type="checkbox"/> vital signs (HR, BP, temperature)<br><input type="checkbox"/> pain intensity (1-10)                                                                                                                                  | <input type="checkbox"/> vital signs (HR, BP, temperature)<br><input type="checkbox"/> pain intensity (1-10) |
| <b>wound / drains</b>             |  |                                                                                                              |                                                                                                              | <input type="checkbox"/> change wound dressing                                                                                                                                                                                                | <input type="checkbox"/> change wound dressing                                                                                                                                                                                                | <input type="checkbox"/> change wound dressing                                                                                                                                                                                                                                                                                         | <input type="checkbox"/> change wound dressing<br><input type="checkbox"/> remove drain after order                                                                                                                                           | <input type="checkbox"/> remove wound staples after order                                                    |

AC= anticoagulation, AP= alkaline phosphatase, BP= blood pressure, BS= blood sugar, ca.= circa, CRP= C-reactive protein, CVP= central venous pressure, DRG= diagnosis related groups, ECG= electrocardiogram, EDC= epidural catheter, EF= Easyflow-Drain, ERCP= endoscopic retrograde cholangiopancreatography, EPT= endoscopic papillotomy, G= Gauge, GH= general health, HPB= hepato-pancreatico-biliary, HR= heart rate, I.V. = intravenous, PAT= patient, POD= postoperative day, PT= physiotherapy, RCC= red cell concentrate, RT= respiratory therapy, sc= subcutaneous. This clinical pathway does not absolve therapists from their responsibility of impact, adverse effect, dosage, contraindications of substances for patients. Recommended dosage is for normal weight adults without contraindications.

| NAME:                          |                                                                                                                                                                                                                                                                                                                                                                                                                                                                                                                                                                                                                                                                                                                                                                                           | SURNAME:                                                                                                                                                                                                                                                                                                                 |                                                                                                                                                                                                                                                                                                                                                                                                                                                                                                                                                                                                                                                                                                                                                                                                                                                                                                                                                                                                   |                                                                                                                                                                                                                                                                                                                                                                       | DATE OF BIRTH:                                                                                                                                                                                                                                                                                     |                                                                                                                                                                                                                                                                                                                                                                                                                                                       |                                                                      | DATE OF SURGERY:                                                                                                                                                                                                                               | DATE OF DISCHARGE: |
|--------------------------------|-------------------------------------------------------------------------------------------------------------------------------------------------------------------------------------------------------------------------------------------------------------------------------------------------------------------------------------------------------------------------------------------------------------------------------------------------------------------------------------------------------------------------------------------------------------------------------------------------------------------------------------------------------------------------------------------------------------------------------------------------------------------------------------------|--------------------------------------------------------------------------------------------------------------------------------------------------------------------------------------------------------------------------------------------------------------------------------------------------------------------------|---------------------------------------------------------------------------------------------------------------------------------------------------------------------------------------------------------------------------------------------------------------------------------------------------------------------------------------------------------------------------------------------------------------------------------------------------------------------------------------------------------------------------------------------------------------------------------------------------------------------------------------------------------------------------------------------------------------------------------------------------------------------------------------------------------------------------------------------------------------------------------------------------------------------------------------------------------------------------------------------------|-----------------------------------------------------------------------------------------------------------------------------------------------------------------------------------------------------------------------------------------------------------------------------------------------------------------------------------------------------------------------|----------------------------------------------------------------------------------------------------------------------------------------------------------------------------------------------------------------------------------------------------------------------------------------------------|-------------------------------------------------------------------------------------------------------------------------------------------------------------------------------------------------------------------------------------------------------------------------------------------------------------------------------------------------------------------------------------------------------------------------------------------------------|----------------------------------------------------------------------|------------------------------------------------------------------------------------------------------------------------------------------------------------------------------------------------------------------------------------------------|--------------------|
| B Pancreatectomy               | PRE-ADMISSION                                                                                                                                                                                                                                                                                                                                                                                                                                                                                                                                                                                                                                                                                                                                                                             | INPATIENT TREATMENT admission                                                                                                                                                                                                                                                                                            | Day of surgery                                                                                                                                                                                                                                                                                                                                                                                                                                                                                                                                                                                                                                                                                                                                                                                                                                                                                                                                                                                    | 1st postoperative day                                                                                                                                                                                                                                                                                                                                                 | 2nd postoperative day                                                                                                                                                                                                                                                                              | 3rd-12th. postoperative day                                                                                                                                                                                                                                                                                                                                                                                                                           | DAY OF DISCHARGE 12th postoperative day                              | POST-DISCHARGE                                                                                                                                                                                                                                 |                    |
| <b>DIAGNOSTICS/MONITORING/</b> | <input type="checkbox"/> medical history<br><input type="checkbox"/> clinical examination<br><input type="checkbox"/> laboratory (blood count, electrolytes, liver- and kidney-specific values, coagulation, HbA1c for all patients, CEA, CA 19-9)<br><input type="checkbox"/> CT or MRI upper abdomen, chest X-ray, if suspicious-> chest CT<br><input type="checkbox"/> after staging: case review at multidisciplinary tumor conference<br><input type="checkbox"/> if albumin <30 g/l: presentation at nutrition clinic<br><br><input type="checkbox"/> consent for anesthesia (including epidural catheter), additional exams on demand<br><input type="checkbox"/> define date of admission/surgery (patient management)<br><input type="checkbox"/> appointment at diabetes clinic | <input type="checkbox"/> laboratory (blood count, electrolytes, liver- and kidney-specific values, coagulation; HbA1c for all patients, CEA, CA 19-9 if not done pre-admission)<br><input type="checkbox"/> crossmatch blood and prepare 2 RCC<br><input type="checkbox"/> ECG if not already performed at pre-admission | <u>Intraoperative monitoring:</u><br><input type="checkbox"/> BP/HR<br><input type="checkbox"/> Relaxation<br><input type="checkbox"/> body temperature (aim >36°C)<br><input type="checkbox"/> BS (target 120-200 mg/dl) every hour, correct with infusion of 5%-glucose or insulin bolus<br><input type="checkbox"/> FiO <sub>2</sub> (desired value 0,7)<br><input type="checkbox"/> CVP<br><br><u>Postoperative</u><br><input type="checkbox"/> intermediate care unit<br><input type="checkbox"/> monitor BP/HR<br><input type="checkbox"/> monitor urinary excretion<br><input type="checkbox"/> monitor surgical drains<br><input type="checkbox"/> at night: small laboratory routine, blood count and coagulation<br><input type="checkbox"/> chest X-ray after central venous catheter insertion<br><input type="checkbox"/> inspect dressings<br><input type="checkbox"/> start insulin perfusor according to the Yale Insulin Infusion Protocol (blood sugar measurements every hour) | <input type="checkbox"/> monitor BP/HR/temperature twice a day.<br><input type="checkbox"/> blood count, electrolytes, liver- and kidney-specific values, coagulation, CRP<br><input type="checkbox"/> insulin according to the Yale Insulin Infusion Protocol (blood sugar measurements every hour)<br><input type="checkbox"/> <b>endocrinological consultation</b> | <input type="checkbox"/> monitor BP/HR/temperature. twice a day<br><input type="checkbox"/> blood sugar day profile<br><input type="checkbox"/> transfer to general ward<br><input type="checkbox"/> insulin according to the Yale Insulin Infusion Protocol (blood sugar measurements every hour) | <input type="checkbox"/> monitor BP/HR/temperature. twice a day<br><input type="checkbox"/> blood count, electrolytes, liver- and kidney-specific values, coagulation, CRP (on day 3 and 7 after surgery)<br><input type="checkbox"/> blood sugar day profile, <b>endocrinological consultation</b> I (day 5), BS target: 140-180mg/dl<br><input type="checkbox"/> in case of nausea/vomiting: abdominal sonography (paralytic ileus? Gastroparesis?) | <input type="checkbox"/> monitor BP/HR/temperature/BS in the morning | <input type="checkbox"/> medical history clinical examination<br><input type="checkbox"/> temperature<br><input type="checkbox"/> in case of symptoms: electrolytes, liver- and kidney-specific values, coagulation, CRP, abdominal sonography |                    |
| <b>ANAESTHESIA</b>             |                                                                                                                                                                                                                                                                                                                                                                                                                                                                                                                                                                                                                                                                                                                                                                                           |                                                                                                                                                                                                                                                                                                                          | <input type="checkbox"/> cefazolin 2g IV (in case of allergy ciprofloxacin 400 mg IV) / metronidazole 500 mg IV <u>30-60 minutes before surgery</u><br><input type="checkbox"/> prewarming<br><input type="checkbox"/> general anesthesia                                                                                                                                                                                                                                                                                                                                                                                                                                                                                                                                                                                                                                                                                                                                                         |                                                                                                                                                                                                                                                                                                                                                                       |                                                                                                                                                                                                                                                                                                    |                                                                                                                                                                                                                                                                                                                                                                                                                                                       |                                                                      |                                                                                                                                                                                                                                                |                    |
| <b>LINES</b>                   |                                                                                                                                                                                                                                                                                                                                                                                                                                                                                                                                                                                                                                                                                                                                                                                           |                                                                                                                                                                                                                                                                                                                          | <input type="checkbox"/> G16 venous cannula<br><input type="checkbox"/> central venous catheter<br><input type="checkbox"/> arterial cannulation<br><input type="checkbox"/> removal of nasogastric tube soon after extubation<br><input type="checkbox"/> epidural anesthesia (Th 8-10)                                                                                                                                                                                                                                                                                                                                                                                                                                                                                                                                                                                                                                                                                                          | <input type="checkbox"/> remove arterial cannula                                                                                                                                                                                                                                                                                                                      | <input type="checkbox"/> remove venous cannula                                                                                                                                                                                                                                                     | <input type="checkbox"/> remove thoracic epidural catheter (in the morning of day 3 after surgery)<br><input type="checkbox"/> remove central venous catheter (on day 3 after surgery)<br><input type="checkbox"/> in case of paralytic ileus / gastroparesis: insert nasogastric tube                                                                                                                                                                |                                                                      |                                                                                                                                                                                                                                                |                    |
| <b>FOLEY CATHETER</b>          |                                                                                                                                                                                                                                                                                                                                                                                                                                                                                                                                                                                                                                                                                                                                                                                           |                                                                                                                                                                                                                                                                                                                          | <input type="checkbox"/> insertion of transurethral foley catheter before surgery                                                                                                                                                                                                                                                                                                                                                                                                                                                                                                                                                                                                                                                                                                                                                                                                                                                                                                                 |                                                                                                                                                                                                                                                                                                                                                                       | <input type="checkbox"/> remove transurethral foley catheter                                                                                                                                                                                                                                       |                                                                                                                                                                                                                                                                                                                                                                                                                                                       |                                                                      |                                                                                                                                                                                                                                                |                    |

AC= anticoagulation, AP= alkaline phosphatase, BP= blood pressure, BS= blood sugar, ca.= circa, CRP= C-reactive protein, CVP= central venous pressure, DRG= diagnosis related groups, ECG= electrocardiogram, EDC= epidural catheter, EF= Easyflow-Drain, ERCP= endoscopic retrograde cholangiopancreatography, EPT= endoscopic papillotomy, G= Gauge, GH= general health, HPB= hepato-pancreatico-biliary, HR= heart rate, I.V. = intravenous, PAT= patient, POD= postoperative day, PT= physiotherapy, RCC= red cell concentrate, RT= respiratory therapy, sc= subcutaneous. This clinical pathway does not absolve therapists from their responsibility of impact, adverse effect, dosage, contraindications of substances for patients. Recommended dosage is for normal weight adults without contraindications.

|                           |                                                                                                                                                                                                                                                                                                                                                                                                                                                                                                          |                                                                                                                                                                                                                                                                                                                                                                                                                             |                                                                                                                                                                                                                                                                                                                                                                                                                                                                                 |                                                                                                                                                                                                                                                                                                                                                                                                                                                      |                                                                                                                                                                                                                                                                                                                                                                                                                                                       |                                                                                                                                                                                                                                                                                                                                                                                                                                                                                                                                                                            |                                                                                                                                                                                                                                                                                                                                                                                                                                                                                                                                                                                                |                                                                                                                                                                                                                                                                           |
|---------------------------|----------------------------------------------------------------------------------------------------------------------------------------------------------------------------------------------------------------------------------------------------------------------------------------------------------------------------------------------------------------------------------------------------------------------------------------------------------------------------------------------------------|-----------------------------------------------------------------------------------------------------------------------------------------------------------------------------------------------------------------------------------------------------------------------------------------------------------------------------------------------------------------------------------------------------------------------------|---------------------------------------------------------------------------------------------------------------------------------------------------------------------------------------------------------------------------------------------------------------------------------------------------------------------------------------------------------------------------------------------------------------------------------------------------------------------------------|------------------------------------------------------------------------------------------------------------------------------------------------------------------------------------------------------------------------------------------------------------------------------------------------------------------------------------------------------------------------------------------------------------------------------------------------------|-------------------------------------------------------------------------------------------------------------------------------------------------------------------------------------------------------------------------------------------------------------------------------------------------------------------------------------------------------------------------------------------------------------------------------------------------------|----------------------------------------------------------------------------------------------------------------------------------------------------------------------------------------------------------------------------------------------------------------------------------------------------------------------------------------------------------------------------------------------------------------------------------------------------------------------------------------------------------------------------------------------------------------------------|------------------------------------------------------------------------------------------------------------------------------------------------------------------------------------------------------------------------------------------------------------------------------------------------------------------------------------------------------------------------------------------------------------------------------------------------------------------------------------------------------------------------------------------------------------------------------------------------|---------------------------------------------------------------------------------------------------------------------------------------------------------------------------------------------------------------------------------------------------------------------------|
| <b>SURGICAL TECHNIQUE</b> |                                                                                                                                                                                                                                                                                                                                                                                                                                                                                                          |                                                                                                                                                                                                                                                                                                                                                                                                                             | <input type="checkbox"/> pancreatectomy with hepato-cojejunostomy and gastroenterostomy                                                                                                                                                                                                                                                                                                                                                                                         |                                                                                                                                                                                                                                                                                                                                                                                                                                                      |                                                                                                                                                                                                                                                                                                                                                                                                                                                       |                                                                                                                                                                                                                                                                                                                                                                                                                                                                                                                                                                            |                                                                                                                                                                                                                                                                                                                                                                                                                                                                                                                                                                                                |                                                                                                                                                                                                                                                                           |
| <b>DRAINS</b>             |                                                                                                                                                                                                                                                                                                                                                                                                                                                                                                          |                                                                                                                                                                                                                                                                                                                                                                                                                             | <input type="checkbox"/> one drain placed on hepato-cojejunostomy                                                                                                                                                                                                                                                                                                                                                                                                               |                                                                                                                                                                                                                                                                                                                                                                                                                                                      |                                                                                                                                                                                                                                                                                                                                                                                                                                                       | <input type="checkbox"/> remove target drain on day 3 after surgery if no bilirubin in drain fluid                                                                                                                                                                                                                                                                                                                                                                                                                                                                         |                                                                                                                                                                                                                                                                                                                                                                                                                                                                                                                                                                                                |                                                                                                                                                                                                                                                                           |
| <b>NUTRITION</b>          | <input type="checkbox"/> balanced diet if possible<br><input type="checkbox"/> supplementary nutrition as required (nutrition clinic)                                                                                                                                                                                                                                                                                                                                                                    | <input type="checkbox"/> balanced diet if possible<br><br><input type="checkbox"/> supplementary nutrition as required (nutrition clinic)                                                                                                                                                                                                                                                                                   | <input type="checkbox"/> sweetened tea up to two hours prior to surgery<br><input type="checkbox"/> postoperative nil-by-mouth                                                                                                                                                                                                                                                                                                                                                  | <input type="checkbox"/> tea in sips (600 ml)                                                                                                                                                                                                                                                                                                                                                                                                        | <input type="checkbox"/> tea at will (1500 ml)<br><input type="checkbox"/> protein drinks                                                                                                                                                                                                                                                                                                                                                             | <input type="checkbox"/> soft diet on day 3 after surgery<br><input type="checkbox"/> diabetes diet on day 4 after surgery<br><input type="checkbox"/> drink >1500 ml                                                                                                                                                                                                                                                                                                                                                                                                      | <input type="checkbox"/> diabetes diet<br><input type="checkbox"/> drink >1500 ml                                                                                                                                                                                                                                                                                                                                                                                                                                                                                                              | <input type="checkbox"/> diabetes diet                                                                                                                                                                                                                                    |
| <b>IV MANAGEMENT</b>      |                                                                                                                                                                                                                                                                                                                                                                                                                                                                                                          |                                                                                                                                                                                                                                                                                                                                                                                                                             | <input type="checkbox"/> maintain normovolaemia during surgery<br><input type="checkbox"/> insulin perfusor, glucose G5% IV, blood sugar measurements every hour<br><input type="checkbox"/> fluid management according to CVP (target <5 cmH <sub>2</sub> O)                                                                                                                                                                                                                   | <input type="checkbox"/> according to fluid balance                                                                                                                                                                                                                                                                                                                                                                                                  | <input type="checkbox"/> according to fluid balance                                                                                                                                                                                                                                                                                                                                                                                                   | <input type="checkbox"/> 1000 ml electrolyte solution (only on day 3 after surgery)                                                                                                                                                                                                                                                                                                                                                                                                                                                                                        | <input type="checkbox"/> none                                                                                                                                                                                                                                                                                                                                                                                                                                                                                                                                                                  |                                                                                                                                                                                                                                                                           |
| <b>DEFECATION</b>         |                                                                                                                                                                                                                                                                                                                                                                                                                                                                                                          |                                                                                                                                                                                                                                                                                                                                                                                                                             |                                                                                                                                                                                                                                                                                                                                                                                                                                                                                 |                                                                                                                                                                                                                                                                                                                                                                                                                                                      | <input type="checkbox"/> magnesium 5 mmol/l as solution po till until first defecation                                                                                                                                                                                                                                                                                                                                                                | <input type="checkbox"/> magnesium 5 mmol/l as solution po till until first defecation                                                                                                                                                                                                                                                                                                                                                                                                                                                                                     |                                                                                                                                                                                                                                                                                                                                                                                                                                                                                                                                                                                                |                                                                                                                                                                                                                                                                           |
| <b>MEDICATION</b>         | <input type="checkbox"/> continue medication<br><input type="checkbox"/> stop coagulation inhibitors, in case of warfarin or direct oral anticoagulants: Fraxiparine 0,1 / 10 kg body weight bid<br><input type="checkbox"/> stop oral antidiabetic medication on admission day<br><input type="checkbox"/> ASS 100 to be continued in case of justified indication<br><input type="checkbox"/> If splenectomy is planned: vaccination with Pneumovax 23, Mencevax ACWY, Act-HiB >14 days before surgery | <input type="checkbox"/> home medication with stated restrictions<br><input type="checkbox"/> insulin scheme: BS 140-200: 4 iU; BS 200-280: 8 iU; BS > 280 12 iU basal insulin sc, control after 2 h<br><input type="checkbox"/> in case of full anticoagulation and planned thoracic EDC: Fraxiparine 0,1 / 10 kg body weight only in the morning<br><input type="checkbox"/> in case of cholestasis: vitamin K 10 mg I.V. | <input type="checkbox"/> home medication up to two hours before surgery (consider above mentioned exceptions)<br><input type="checkbox"/> premedication as recommended by anesthesiologist<br><input type="checkbox"/> insulin scheme according to the Yale Insulin Protocol<br><input type="checkbox"/> Pantoprazole 40 mg IV at nighttime<br><input type="checkbox"/> in case of cholestasis: vitamin K 10 mg I.V.<br><input type="checkbox"/> in the morning: no Fraxiparine | <input type="checkbox"/> home medication (consider above mentioned exceptions)<br><input type="checkbox"/> insulin scheme according to the Yale Insulin Protocol<br><input type="checkbox"/> Pantoprazole 40 mg IV 1-0-1<br><input type="checkbox"/> Fraxiparine 0,3 ml sc 0-0-1 (in case of full anticoagulation: Fraxiparine 0,1 / 10 kg body weight only in the morning)<br><input type="checkbox"/> in case of cholestasis: vitamin K 10 mg I.V. | <input type="checkbox"/> home medication (consider above mentioned exceptions),<br><input type="checkbox"/> insulin scheme according to the Yale Insulin Protocol<br><input type="checkbox"/> Pantoprazole 40 mg IV 1-0-1<br><input type="checkbox"/> Fraxiparine 0,3 ml sc 0-0-1 (in case of full anticoagulation: Fraxiparine 0,1 / 10 kg body weight only in the morning)<br><input type="checkbox"/> in case of cholestasis: vitamin K 10 mg I.V. | <input type="checkbox"/> home medication (consider above mentioned exceptions)<br><input type="checkbox"/> insulin sc according to <b>endocrinological consultation</b><br><input type="checkbox"/> Pantoprazole 40 mg IV 1-0-1<br><input type="checkbox"/> Fraxiparine 0,3 ml sc 0-0-1 (in case of full anticoagulation: Fraxiparine 0,1 / 10 kg body weight twice a day<br><input type="checkbox"/> in case of gastroparesis: erythromycin 4 x 250 mg I.V.<br><input type="checkbox"/> once normal diet achieved: pancreatic enzymes 3 x 25000 iE in case of steatorrhea | <input type="checkbox"/> home medication (consider above mentioned exceptions)<br><input type="checkbox"/> insulin sc according to <b>endocrinological consultation</b><br><input type="checkbox"/> Pantoprazole 40 mg IV 1-0-1<br><input type="checkbox"/> stop Fraxiparine (in case of full anticoagulation: Fraxiparine 0,1 / 10 kg body weight twice a day, overlap with warfarin or direct oral anticoagulants)<br><input type="checkbox"/> pancreatic enzymes 3 x 25000 iE in case of steatorrhea<br><input type="checkbox"/> after splenectomy: vaccination with Pneumovax 23, Mencevax | <input type="checkbox"/> home medication, restart anticoagulant medication 14 days after surgery<br><input type="checkbox"/> if vaccination could not be realized on ward or by family physician after splenectomy: vaccination with Pneumovax 23, Mencevax ACWY, Act-HiB |

AC= anticoagulation, AP= alkaline phosphatase, BP= blood pressure, BS= blood sugar, ca.= circa, CRP= C-reactive protein, CVP= central venous pressure, DRG= diagnosis related groups, ECG= electrocardiogram, EDC= epidural catheter, EF= Easyflow Drain, ERCP= endoscopic retrograde cholangiopancreatography, EPT= endoscopic papillotomy, G= Gauge, GH= general health, HPB= hepato-pancreatico-biliary, HR= heart rate, I.V. = intravenous, PAT= patient, POD= postoperative day, PT= physiotherapy, RCC= red cell concentrate, RT= respiratory therapy, sc= subcutaneous. This clinical pathway does not absolve therapists from their responsibility of impact, adverse effect, dosage, contraindications of substances for patients. Recommended dosage is for normal weight adults without contraindications.



|                                                                           |                    |             |                                                                                                                                                                                                                                                                         |                                                                              |                                                                                                                                                                                                                                                                                    |                                                                                                                                                                                                                                                                                    |                                                                                                                                                                                                                                                                                    |                                                                 |
|---------------------------------------------------------------------------|--------------------|-------------|-------------------------------------------------------------------------------------------------------------------------------------------------------------------------------------------------------------------------------------------------------------------------|------------------------------------------------------------------------------|------------------------------------------------------------------------------------------------------------------------------------------------------------------------------------------------------------------------------------------------------------------------------------|------------------------------------------------------------------------------------------------------------------------------------------------------------------------------------------------------------------------------------------------------------------------------------|------------------------------------------------------------------------------------------------------------------------------------------------------------------------------------------------------------------------------------------------------------------------------------|-----------------------------------------------------------------|
| <b>TRANSFUSION</b>                                                        |                    |             | <input type="checkbox"/> if Hb <8 g/dl or cardiopulmonary disorders                                                                                                                                                                                                     | <input type="checkbox"/> if Hb <8 g/dl or cardiopulmonary disorders          | <input type="checkbox"/> if Hb <8 g/dl or cardiopulmonary disorders                                                                                                                                                                                                                | <input type="checkbox"/> if Hb < 8g/dl or cardiopulmonary disorders                                                                                                                                                                                                                | ACWY, Act-HiB                                                                                                                                                                                                                                                                      |                                                                 |
| <b>ANALGESIA</b>                                                          | <b>intravenous</b> |             | <u>Intraoperative</u><br><input type="checkbox"/> Metamizole 1 g I.V.                                                                                                                                                                                                   | <input type="checkbox"/> Metamizole 1 g I.V.                                 | <input type="checkbox"/> to avoid                                                                                                                                                                                                                                                  | <input type="checkbox"/> to avoid                                                                                                                                                                                                                                                  |                                                                                                                                                                                                                                                                                    |                                                                 |
|                                                                           |                    | <b>oral</b> | <u>Postoperative</u><br><input type="checkbox"/> Metamizole 1 g I.V.<br><br><input type="checkbox"/> Piritramide 7,5 mg IV only in case of failed epidural anesthesia                                                                                                   | <input type="checkbox"/> IV only in case of failed epidural anesthesia       |                                                                                                                                                                                                                                                                                    |                                                                                                                                                                                                                                                                                    |                                                                                                                                                                                                                                                                                    |                                                                 |
| <b>EPIDURAL CATHETER</b>                                                  | <b>REHAB</b>       |             |                                                                                                                                                                                                                                                                         |                                                                              | <b>Pain ladder</b><br><br><i>Step 1:</i> metamizole 4x1 g p.o, on demand. paracetamol 4x1g p.o.<br><br><i>Step 2:</i> additional oxycodone/naloxone 10/5 mg p.o., oxycodone 5-10 mg on demand<br><br><i>Step 3:</i> pain consultation<br><br>oxycodone/naloxone 5/2,5 mg at age>75 | <b>Pain ladder</b><br><br><i>Step 1:</i> metamizole 4x1 g p.o, on demand. paracetamol 4x1g p.o.<br><br><i>Step 2:</i> additional oxycodone/naloxone 10/5 mg p.o., oxycodone 5-10 mg on demand<br><br><i>Step 3:</i> pain consultation<br><br>oxycodone/naloxone 5/2,5 mg at age>75 | <b>Pain ladder</b><br><br><i>Step 1:</i> metamizole 4x1 g p.o, on demand. paracetamol 4x1g p.o.<br><br><i>Step 2:</i> additional oxycodone/naloxone 10/5 mg p.o., oxycodone 5-10 mg on demand<br><br><i>Step 3:</i> pain consultation<br><br>oxycodone/naloxone 5/2,5 mg at age>75 | <input type="checkbox"/> on demand                              |
|                                                                           |                    |             | <input type="checkbox"/> thoracic epidural delivery pump: ropivacaine 0,2% + 20 µg sufentanil epidural (46 ml ropivacaine 0,2% + 4 ml sufentanil epidural= 0,4 µg sufentanil /ml), 3-7 ml/h                                                                             | <input type="checkbox"/> thoracic epidural catheter (T8-10) as stated before | <input type="checkbox"/> thoracic epidural catheter (T8-10) as stated before                                                                                                                                                                                                       | <input type="checkbox"/> remove thoracic epidural catheter in the morning of day 3 after surgery (in case of full anticoagulation pause Fraxiparine 24h before removal and 2-4h thereafter)                                                                                        |                                                                                                                                                                                                                                                                                    |                                                                 |
|                                                                           |                    |             |                                                                                                                                                                                                                                                                         |                                                                              |                                                                                                                                                                                                                                                                                    | <input type="checkbox"/> request rehabilitation treatment, when no adjuvant treatment is planned                                                                                                                                                                                   |                                                                                                                                                                                                                                                                                    | <input type="checkbox"/> inquire about rehabilitation treatment |
| <b>QUALITY MANAGEMENT/ MEDICAL REPORT/ DRG (diagnosis related groups)</b> |                    |             | <input type="checkbox"/> collect tissue samples for research<br><br><input type="checkbox"/> request pathology report (surgeon)<br><input type="checkbox"/> brief operation report (surgeon)<br><input type="checkbox"/> detailed operation report (written by surgeon) |                                                                              |                                                                                                                                                                                                                                                                                    | <input type="checkbox"/> check pathology report<br><br><input type="checkbox"/> case review at multidisciplinary tumor conference<br><br><input type="checkbox"/> plan outpatient follow up appointment on day 8 after surgery<br><br><input type="checkbox"/> prepare discharge   | <input type="checkbox"/> hand discharge letter to patient<br><input type="checkbox"/> hand chart to chief resident for DRG coding                                                                                                                                                  |                                                                 |

AC= anticoagulation, AP= alkaline phosphatase, BP= blood pressure, BS= blood sugar, ca.= circa, CRP= C-reactive protein, CVP= central venous pressure, DRG= diagnosis related groups, ECG= electrocardiogram, EDC= epidural catheter, EF= Easyflow-Drain, ERCP= endoscopic retrograde cholangiopancreatography, EPT= endoscopic papillotomy, G= Gauge, GH= general health, HPB= hepato-pancreatico-biliary, HR= heart rate, I.V. = intravenous, PAT= patient, POD= postoperative day, PT= physiotherapy, RCC= red cell concentrate, RT= respiratory therapy, sc= subcutaneous. This clinical pathway does not absolve therapists from their responsibility of impact, adverse effect, dosage, contraindications of substances for patients. Recommended dosage is for normal weight adults without contraindications.

|                                     |                                                                                                                                                                              |                                                                                                                                                                         |                                                                                                                                                                                                   |                                                                                                                                                                                                                                               |                                                                                                                                                                                                                                               |                                                                                                                                                                                                                                                                                                                                        |                                                                                                                                                                                                                                               |                                                                                                                                                          |
|-------------------------------------|------------------------------------------------------------------------------------------------------------------------------------------------------------------------------|-------------------------------------------------------------------------------------------------------------------------------------------------------------------------|---------------------------------------------------------------------------------------------------------------------------------------------------------------------------------------------------|-----------------------------------------------------------------------------------------------------------------------------------------------------------------------------------------------------------------------------------------------|-----------------------------------------------------------------------------------------------------------------------------------------------------------------------------------------------------------------------------------------------|----------------------------------------------------------------------------------------------------------------------------------------------------------------------------------------------------------------------------------------------------------------------------------------------------------------------------------------|-----------------------------------------------------------------------------------------------------------------------------------------------------------------------------------------------------------------------------------------------|----------------------------------------------------------------------------------------------------------------------------------------------------------|
|                                     |                                                                                                                                                                              |                                                                                                                                                                         |                                                                                                                                                                                                   |                                                                                                                                                                                                                                               |                                                                                                                                                                                                                                               | letter for referring physicians (including postoperative recommendations and post discharge appointment)                                                                                                                                                                                                                               |                                                                                                                                                                                                                                               |                                                                                                                                                          |
| <b>INFORMATION AND CONSENT</b>      | <input type="checkbox"/> avoid alcohol and smoking 14 days before surgery<br><input type="checkbox"/> informed consent<br><input type="checkbox"/> hand out patient brochure |                                                                                                                                                                         | <input type="checkbox"/> information of next-of-kin by surgeon (red sheet)<br><input type="checkbox"/> inform patient postoperatively<br><br><input type="checkbox"/> inform referring physicians |                                                                                                                                                                                                                                               |                                                                                                                                                                                                                                               |                                                                                                                                                                                                                                                                                                                                        | <input type="checkbox"/> final discussion with patient and next-of-kin (histological result and postoperative recommendations)<br><input type="checkbox"/> phone call to referring physician                                                  | <input type="checkbox"/> discuss histological result and further recommendations with patient (if not happened before), communicate further appointments |
| <b>NURSING</b>                      |                                                                                                                                                                              | <input type="checkbox"/> PAT-admission + information<br><input type="checkbox"/> PAT-history<br><input type="checkbox"/> „red sheet “: next-of-kin phone number         | <u>Postoperative:</u><br><input type="checkbox"/> PAT-information<br><input type="checkbox"/> counseling/guidance<br><input type="checkbox"/> effectuation of orders from operative report        |                                                                                                                                                                                                                                               |                                                                                                                                                                                                                                               | <input type="checkbox"/> prepare discharge documents<br><input type="checkbox"/> schedule outpatient follow-up appointment on day 8 after surgery<br><input type="checkbox"/> discharge talk                                                                                                                                           | <input type="checkbox"/> PAT-discharge                                                                                                                                                                                                        |                                                                                                                                                          |
| <b>patient admission/ discharge</b> |                                                                                                                                                                              |                                                                                                                                                                         |                                                                                                                                                                                                   |                                                                                                                                                                                                                                               |                                                                                                                                                                                                                                               |                                                                                                                                                                                                                                                                                                                                        |                                                                                                                                                                                                                                               |                                                                                                                                                          |
| <b>medical round / elaboration</b>  |                                                                                                                                                                              | <input type="checkbox"/> participation in ward round<br><input type="checkbox"/> effectuation of ward round orders<br><input type="checkbox"/> print laboratory results | <input type="checkbox"/> participation in ward round<br><input type="checkbox"/> effectuation of ward round orders<br><input type="checkbox"/> print laboratory results                           | <input type="checkbox"/> participation in ward round<br><input type="checkbox"/> effectuation of ward round orders<br><input type="checkbox"/> print laboratory results                                                                       | <input type="checkbox"/> participation in ward round<br><input type="checkbox"/> effectuation of ward round orders                                                                                                                            | <input type="checkbox"/> participation in ward round<br><input type="checkbox"/> effectuation of ward round orders                                                                                                                                                                                                                     | <input type="checkbox"/> participation in ward round<br><input type="checkbox"/> effectuation of ward round orders<br><input type="checkbox"/> printout of laboratory results                                                                 |                                                                                                                                                          |
| <b>documentation</b>                | <input type="checkbox"/> insert CP sheet into inpatient chart                                                                                                                | <input type="checkbox"/> insert CP sheet into inpatient chart                                                                                                           | <input type="checkbox"/> document secondary diagnosis (DRG form)<br><input type="checkbox"/> document nursing activities                                                                          | <input type="checkbox"/> document secondary diagnosis (DRG form)<br><input type="checkbox"/> document nursing activities                                                                                                                      | <input type="checkbox"/> document secondary diagnosis (DRG form)<br><input type="checkbox"/> document nursing activities                                                                                                                      | <input type="checkbox"/> document secondary diagnosis (DRG form)<br><input type="checkbox"/> document nursing activities                                                                                                                                                                                                               | <input type="checkbox"/> document secondary diagnosis (DRG form)<br><input type="checkbox"/> document nursing activities                                                                                                                      |                                                                                                                                                          |
| <b>patient care</b>                 |                                                                                                                                                                              | <input type="checkbox"/> care according to nursing standard<br><input type="checkbox"/> drug administration                                                             | <input type="checkbox"/> care according to nursing standard<br><input type="checkbox"/> drug administration                                                                                       | <input type="checkbox"/> care according to nursing standard<br><input type="checkbox"/> drug administration<br><input type="checkbox"/> BT (spirometer prophylaxis, expectorant, Pine menthol)<br><input type="checkbox"/> thromboprophylaxis | <input type="checkbox"/> care according to nursing standard<br><input type="checkbox"/> drug administration<br><input type="checkbox"/> BT (spirometer prophylaxis, expectorant, Pine menthol)<br><input type="checkbox"/> thromboprophylaxis | <input type="checkbox"/> care according to nursing standard<br><input type="checkbox"/> drug administration<br><input type="checkbox"/> BT (spirometer prophylaxis, expectorant, Pine menthol)<br><input type="checkbox"/> thromboprophylaxis<br><input type="checkbox"/> schedule discharge appointment at outpatient diabetes clinic | <input type="checkbox"/> care according to nursing standard<br><input type="checkbox"/> drug administration<br><input type="checkbox"/> BT (spirometer prophylaxis, expectorant, Pine menthol)<br><input type="checkbox"/> thromboprophylaxis | <input type="checkbox"/> continue diabetes counseling                                                                                                    |
| <b>mobilization/ physiotherapy</b>  |                                                                                                                                                                              |                                                                                                                                                                         | <input type="checkbox"/> mobilization: 5 h after surgery to edge of bed depending on age/GH/time                                                                                                  | <input type="checkbox"/> mobilization: >4h out of bed; walk on aisle twice, depending on age/ GH<br><input type="checkbox"/> PT in case of COPD, impaired mobility, prolonged bedriddenness                                                   | <input type="checkbox"/> mobilization: >4h out of bed; walk on aisle twice, depending on age/ GH<br><input type="checkbox"/> PT in case of COPD, impaired mobility, prolonged bedriddenness                                                   | <input type="checkbox"/> complete mobilization (in bed only during nap and at night)<br><input type="checkbox"/> PT in case of COPD, impaired mobility, prolonged bedriddenness                                                                                                                                                        | <input type="checkbox"/> complete mobilization (in bed only during nap and at night)                                                                                                                                                          |                                                                                                                                                          |

AC= anticoagulation, AP= alkaline phosphatase, BP= blood pressure, BS= blood sugar, ca.= circa, CRP= C-reactive protein, CVP= central venous pressure, DRG= diagnosis related groups, ECG= electrocardiogram, EDC= epidural catheter, EF= Easyflow-Drain, ERCP= endoscopic retrograde cholangiopancreatography, EPT= endoscopic papillotomy, G= Gauge, GH= general health, HPB= hepato-pancreatico-biliary, HR= heart rate, I.V. = intravenous, PAT= patient, POD= postoperative day, PT= physiotherapy, RCC= red cell concentrate, RT= respiratory therapy, sc= subcutaneous. This clinical pathway does not absolve therapists from their responsibility of impact, adverse effect, dosage, contraindications of substances for patients. Recommended dosage is for normal weight adults without contraindications.

|                 |                |                                                                                                              |                                                                                                                                                                                                                                        |                                                                                                                                                                                                                                        |                                                                                                                                                                                                                                        |                                                                                                                                                                          |                                                                                                              |                                                                                                              |
|-----------------|----------------|--------------------------------------------------------------------------------------------------------------|----------------------------------------------------------------------------------------------------------------------------------------------------------------------------------------------------------------------------------------|----------------------------------------------------------------------------------------------------------------------------------------------------------------------------------------------------------------------------------------|----------------------------------------------------------------------------------------------------------------------------------------------------------------------------------------------------------------------------------------|--------------------------------------------------------------------------------------------------------------------------------------------------------------------------|--------------------------------------------------------------------------------------------------------------|--------------------------------------------------------------------------------------------------------------|
| patient control |                | <input type="checkbox"/> vital signs (HR, BP, temperature)<br><input type="checkbox"/> pain intensity (1-10) | <input type="checkbox"/> vital signs (HR, BP, temperature)<br><input type="checkbox"/> pain intensity (1-10)<br><input type="checkbox"/> BS-monitoring (according to the intensive Yale Protocol, blood sugar measurements every hour) | <input type="checkbox"/> vital signs (HR, BP, temperature)<br><input type="checkbox"/> pain intensity (1-10)<br><input type="checkbox"/> BS-monitoring (according to the intensive Yale Protocol, blood sugar measurements every hour) | <input type="checkbox"/> vital signs (HR, BP, temperature)<br><input type="checkbox"/> pain intensity (1-10)<br><input type="checkbox"/> BS-monitoring (according to the intensive Yale Protocol, blood sugar measurements every hour) | <input type="checkbox"/> vital signs (HR, BP, temperature)<br><input type="checkbox"/> pain intensity (1-10)<br><input type="checkbox"/> on general ward: BS day profile | <input type="checkbox"/> vital signs (HR, BP, temperature)<br><input type="checkbox"/> pain intensity (1-10) | <input type="checkbox"/> vital signs (HR, BP, temperature)<br><input type="checkbox"/> pain intensity (1-10) |
|                 | wound / drains |                                                                                                              |                                                                                                                                                                                                                                        | <input type="checkbox"/> change wound dressing                                                                                                                                                                                         | <input type="checkbox"/> change wound dressing                                                                                                                                                                                         | <input type="checkbox"/> change wound dressing                                                                                                                           | <input type="checkbox"/> change wound dressing<br><br><input type="checkbox"/> remove drain after order      | <input type="checkbox"/> remove wound staples after order                                                    |

AC= anticoagulation, AP= alkaline phosphatase, BP= blood pressure, BS= blood sugar, ca.= circa, CRP= C-reactive protein, CVP= central venous pressure, DRG= diagnosis related groups, ECG= electrocardiogram, EDC= epidural catheter, EF= Easyflow-Drain, ERCP= endoscopic retrograde cholangiopancreatography, EPT= endoscopic papillotomy, G= Gauge, GH= general health, HPB= hepato-pancreatico-biliary, HR= heart rate, I.V. = intravenous, PAT= patient, POD= postoperative day, PT= physiotherapy, RCC= red cell concentrate, RT= respiratory therapy, sc= subcutaneous. This clinical pathway does not absolve therapists from their responsibility of impact, adverse effect, dosage, contraindications of substances for patients. Recommended dosage is for normal weight adults without contraindications.
